# Supplementary material for: Age-related DNA methylation changes are tissue-specific with ELOVL2 promoter methylation as exception
Source: PubMed Central journal article supplement (PMC5975493; doi:10.1186/s13072-018-0191-3), 2018-05-30
Supplement: 13072_2018_191_MOESM5_ESM.pdf [file 13072_2018_191_MOESM5_ESM.pdf]

A

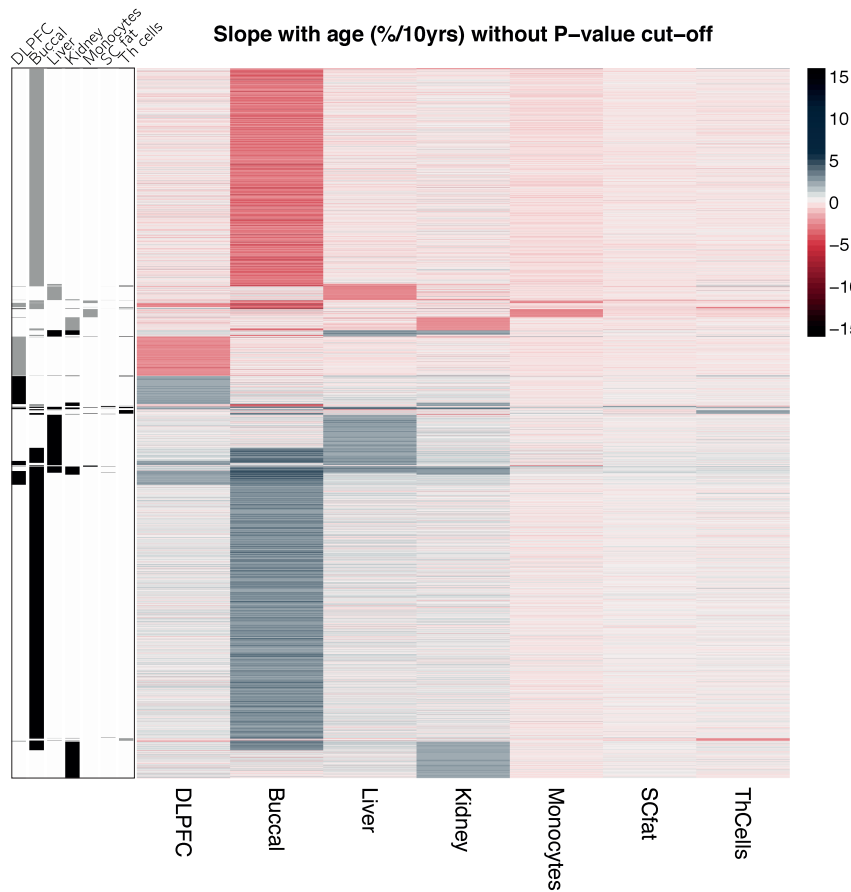

B

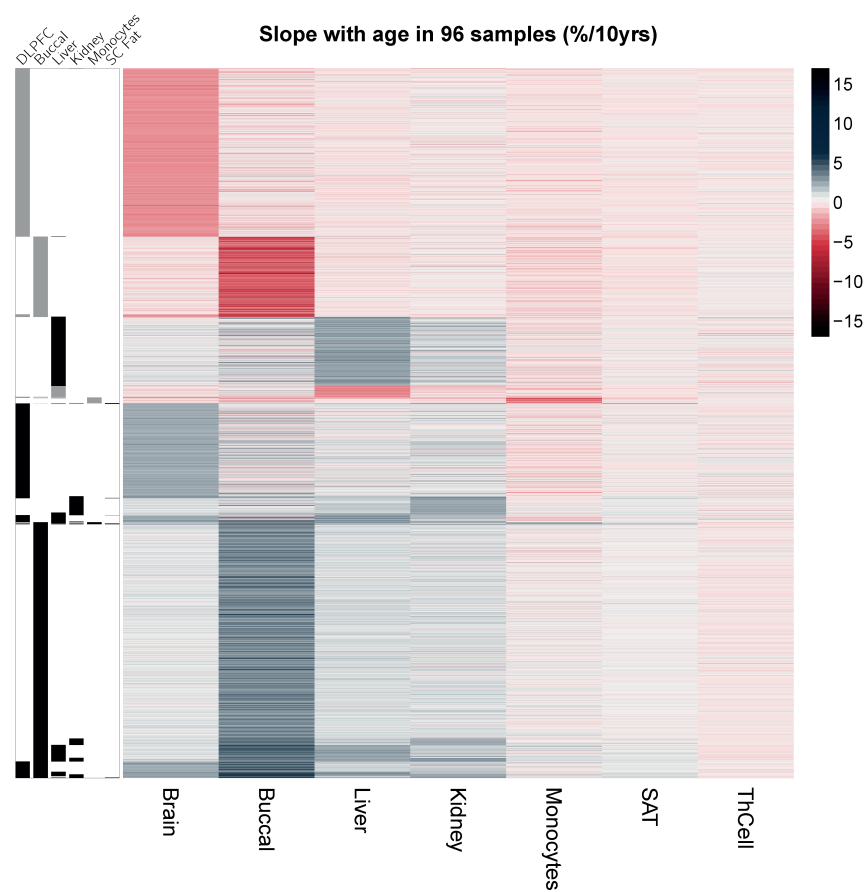

C

|                 | Brain | Buccal | Liver | Kidney | Monocytes | SC fat | Th cells |
|-----------------|-------|--------|-------|--------|-----------|--------|----------|
| Brain (4622)    |       | 870    | 993   | 700    | 123       | 102    | 1        |
| Buccal (4857))  | 3309  |        | 2568  | 1618   | 403       | 309    | 2        |
| Liver (2910)    | 1703  | 964    |       | 884    | 168       | 214    | 4        |
| Kidney (703)    | 602   | 441    | 549   |        | 87        | 195    | 1        |
| Monocytes (657) | 254   | 135    | 126   | 49     |           | 37     | 0        |
| SC fat (59)     | 54    | 38     | 44    | 38     | 21        |        | 0        |
| ThCells (39)    | 28    | 23     | 28    | 15     | 19        | 18     |          |
