# Supplementary material for: Age-related DNA methylation changes are tissue-specific with ELOVL2 promoter methylation as exception
Source: PubMed Central journal article supplement (PMC5975493; doi:10.1186/s13072-018-0191-3), 2018-05-30
Supplement: 13072_2018_191_MOESM6_ESM.pdf [file 13072_2018_191_MOESM6_ESM.pdf]

# Slope with age (%/10yrs)

Brain  
Buccal  
Liver  
Kidney  
Monocytes  
SC Fat  
Th cells  
Blood

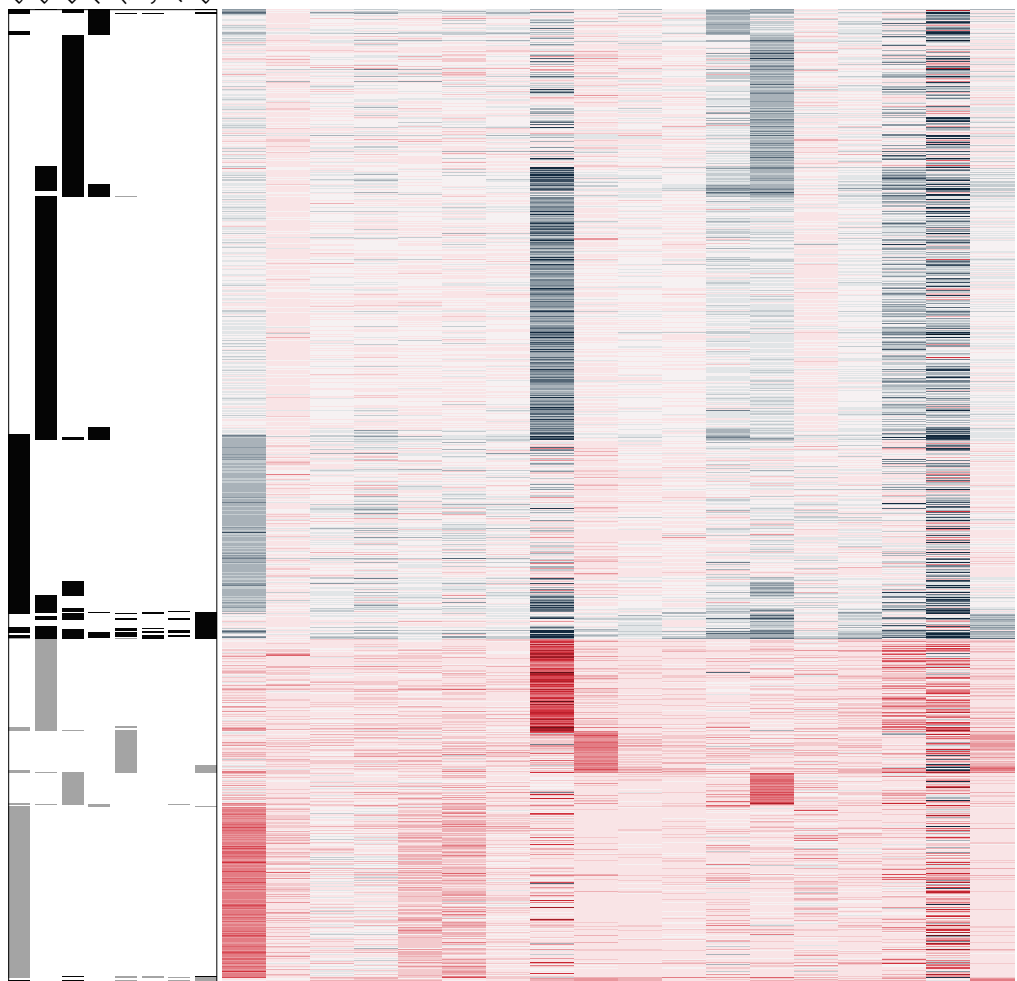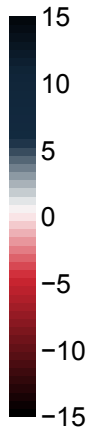

Brain  
Buccal  
Liver  
Kidney  
Monocytes  
SC Fat  
Th cells  
Blood

Blood  
Thyroid  
Epidermis  
Dermis  
Muscle  
Liver  
Kidney  
SC Fat  
Th cell  
Monocytes  
Buccal  
Brain Temporal  
Brain Parietal  
Brain Occipital  
Brain Hippocampus  
Brain Frontal  
Brain CRBM  
Brain DLPFC
