# Supplementary material for: Age-related DNA methylation changes are tissue-specific with ELOVL2 promoter methylation as exception
Source: PubMed Central journal article supplement (PMC5975493; doi:10.1186/s13072-018-0191-3), 2018-05-30
Supplement: 13072_2018_191_MOESM7_ESM.pdf [file 13072_2018_191_MOESM7_ESM.pdf]

## Gain-aDMPs

## Loss-aDMPs

Brain

gain-aDMPs

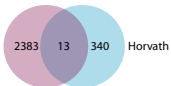

Horvath

loss-aDMPs

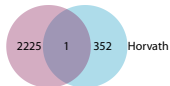

Horvath

Buccal

gain-aDMPs

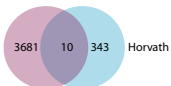

Horvath

loss-aDMPs

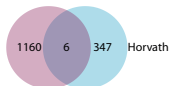

Horvath

Liver

gain-aDMPs

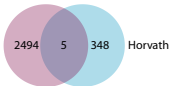

Horvath

loss-aDMPs

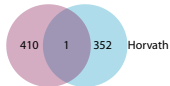

Horvath

Kidney

gain-aDMPs

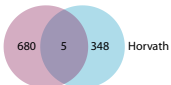

Horvath

loss-aDMPs

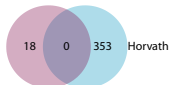

Horvath

Monocytes

gain-aDMPs

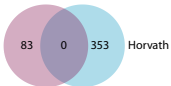

Horvath

loss-aDMPs

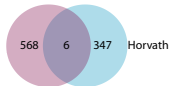

Horvath

SAT

gain-aDMPs

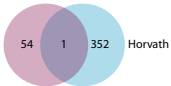

Horvath

loss-aDMPs

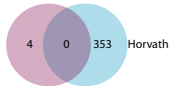

Horvath

ThCell

gain-aDMPs

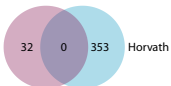

Horvath

loss-aDMPs

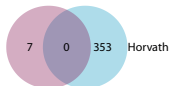

Horvath

Blood

gain-aDMPs

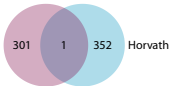

Horvath

loss-aDMPs

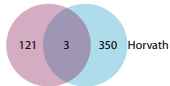

Horvath
