# Supplementary material for: Age-related DNA methylation changes are tissue-specific with ELOVL2 promoter methylation as exception
Source: PubMed Central journal article supplement (PMC5975493; doi:10.1186/s13072-018-0191-3), 2018-05-30

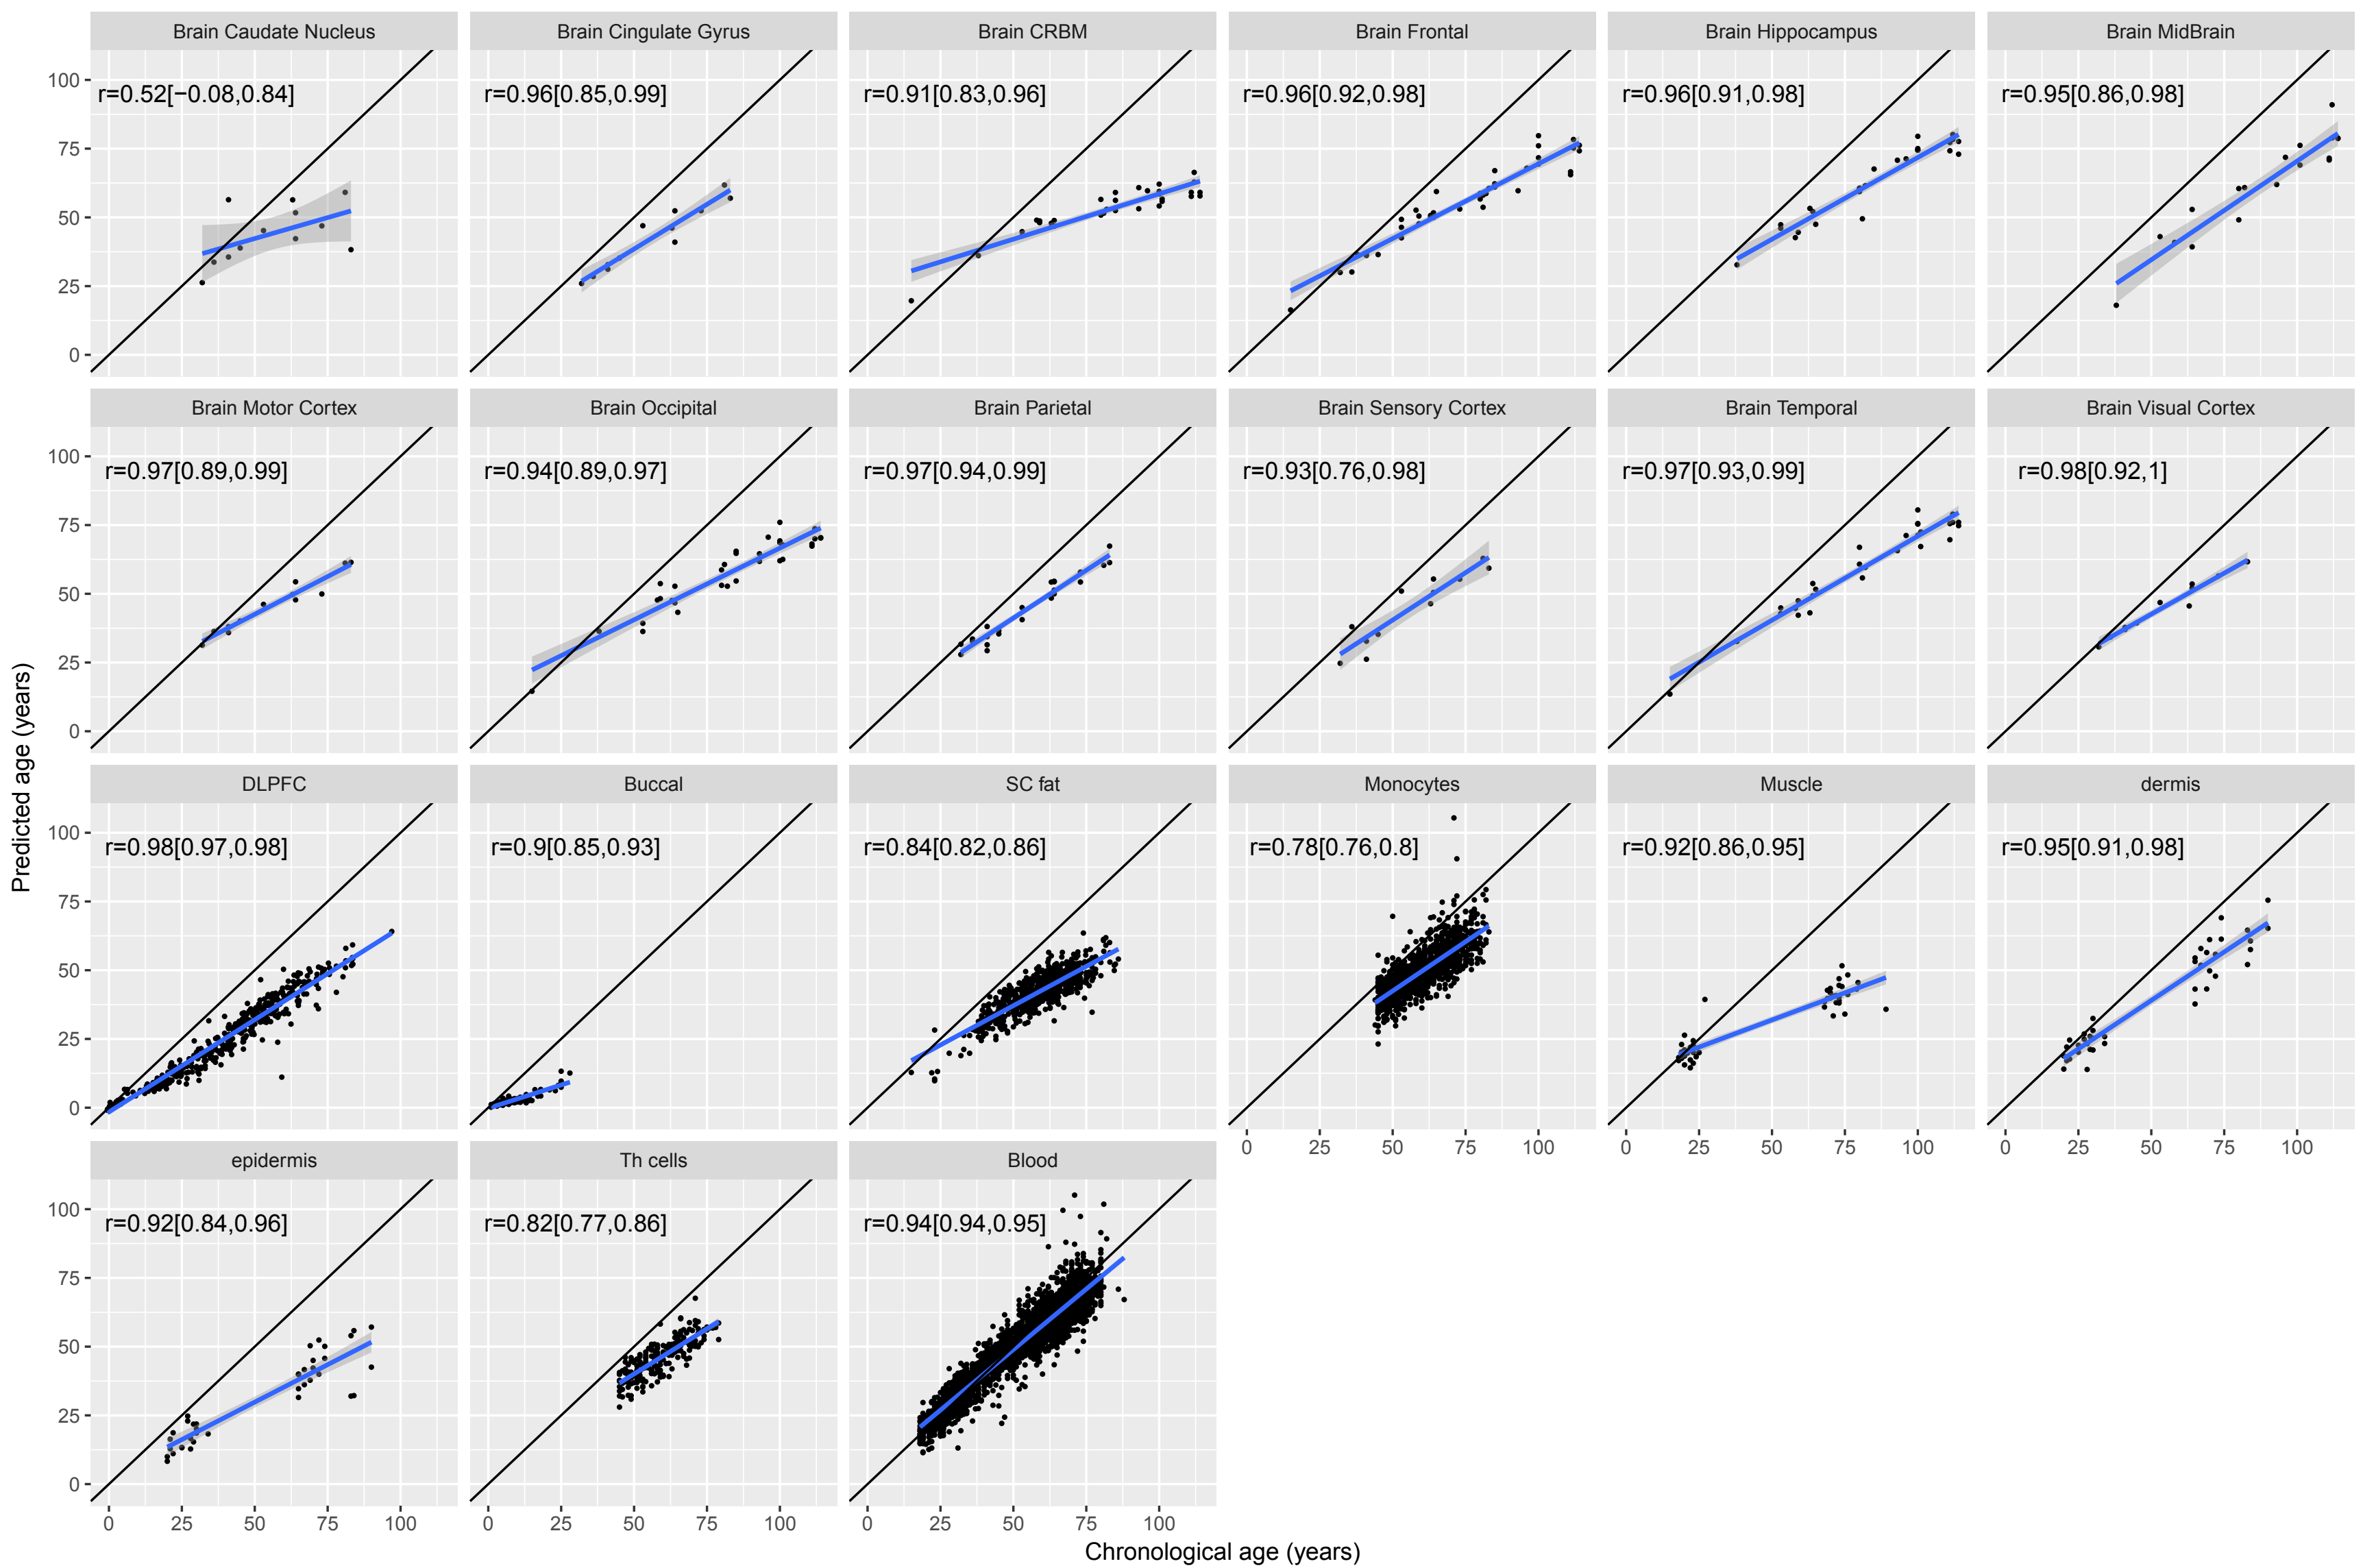

Supplement: 13072_2018_191_MOESM8_ESM.pdf [file 13072_2018_191_MOESM8_ESM.pdf]
