# Supplementary material for: Age-related DNA methylation changes are tissue-specific with ELOVL2 promoter methylation as exception
Source: PubMed Central journal article supplement (PMC5975493; doi:10.1186/s13072-018-0191-3), 2018-05-30

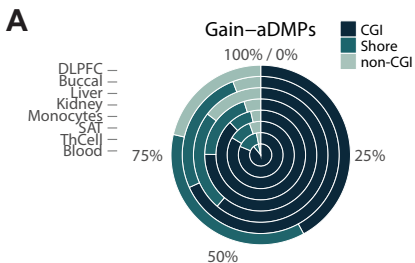

| Tissue    | CGI  | Shore | n-CGI |
|-----------|------|-------|-------|
| Brain     | 1.6  | 1.2   | 0.5   |
| Buccal    | 4.7  | 0.7   | 0.1   |
| Liver     | 3.4  | 0.7   | 0.3   |
| Kidney    | 6.5  | 0.5   | 0.1   |
| Monocytes | 15.6 | 0.2   | 0.1   |
| SC Fat    | 10.9 | 0.3   | 0.1   |
| Th cell   | 9.3  | 0.4   | 0.1   |
| Blood     | 17.5 | 0.2   | 0.1   |

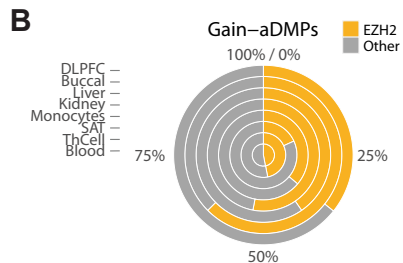

| Tissue    | OR   |
|-----------|------|
| Brain     | 4.1  |
| Buccal    | 12.7 |
| Liver     | 5.0  |
| Kidney    | 8.2  |
| SC Fat    | 1.6  |
| ThCell    | 6.4  |
| Monocytes | 4.1  |
| Blood     | 6.5  |

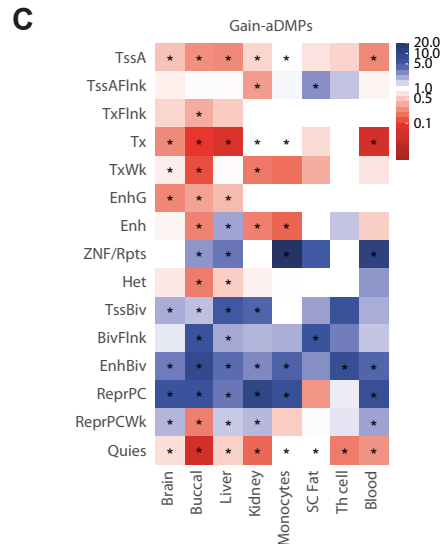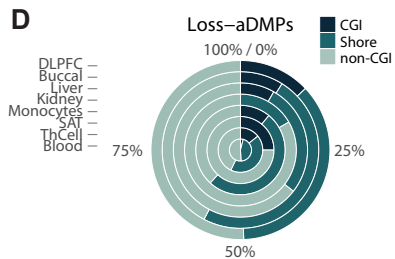

| Tissue    | CGI | Shore | n-CGI |
|-----------|-----|-------|-------|
| Brain     | 0.3 | 1.2   | 1.9   |
| Buccal    | 0.2 | 2.0   | 1.3   |
| Liver     | 0.2 | 0.8   | 3.3   |
| Kidney    | -   | 0.4   | 9.1   |
| Monocytes | 0.3 | 2.1   | 1.1   |
| SC Fat    | 0.7 | -     | 5.5   |
| Th cell   | 0.4 | 1.5   | 1.4   |
| Blood     | 0.1 | 1.7   | 1.9   |

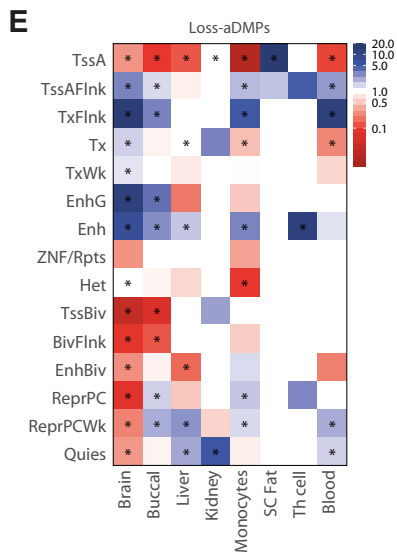

Supplement: 13072_2018_191_MOESM10_ESM.pdf [file 13072_2018_191_MOESM10_ESM.pdf]
